# Supplementary material
Source: MDPI journal article supplement (https://www.mdpi.com/1424-8247/15/2/110)
Supplement: s1 [file s1]

# Computational and Biological Evaluation of $\beta$ -adrenoreceptor Blockers as Promising Bacterial Anti-Virulence Agents

Ahmad J. Almalki <sup>1,\*</sup>, Tarek S. Ibrahim <sup>1</sup>, Sameh S. Elhady <sup>2</sup>, Wael A. H. Hegazy <sup>3</sup> and Khaled M. Darwish <sup>4,\*</sup>

<sup>1</sup> Department of Pharmaceutical Chemistry, Faculty of Pharmacy, King Abdulaziz University, Jeddah, 21589, Saudi Arabia; tmabraham@kau.edu.sa

<sup>2</sup> Department of Natural Products, Faculty of Pharmacy, King Abdulaziz University, Jeddah 21589, Saudi Arabia; ssahmed@kau.edu.sa

<sup>3</sup> Department of Microbiology and Immunology, Faculty of Pharmacy, Zagazig University, Zagazig, 44519, Egypt; waelmhegazy@daad-alumni.de

<sup>4</sup> Medicinal Chemistry Department, Faculty of Pharmacy, Suez Canal University, Ismailia 41522, Egypt

\* Correspondence: ajalmalki@kau.edu.sa (A.J.A.); khaled\_darwish@pharm.suez.edu.eg (K.M.D.)

## Additional Experimental Detail

- 1) **Table S1.** Descriptive ligand-TraR *A. tumefaciens* binding interactions through directed flexible docking protocol.
- 2) **Table S2.** Descriptive ligand-QscR *P. aeruginosa* binding interactions through directed flexible docking protocol.
- 3) **Table S3.** Descriptive ligand-CviR *C. violaceum* binding interactions through directed flexible docking protocol.
- 4) **Table S4.** Estimated  $\Delta$ RMSF values for ligand-TraR *A. tumefaciens* proteins along the whole MD simulation.
- 5) **Table S5.** Estimated  $\Delta$ RMSF values for ligand-QscR *P. aeruginosa* proteins along the whole MD simulation.
- 6) **Table S6.** Estimated  $\Delta$ RMSF values for ligand-CviR *C. violaceum* proteins along the whole MD simulation.
- 7) **Table S7.** Sequences of the used primers in this study
- 8) **Figure S1.** 3D-representation of the binding site topology at the three bacterial LuxR-type quorum-sensing transcription factors.
- 9) **Figure S2.** Conformational analysis of simulated ligand-TraR *A. tumefaciens* protein complexes.
- 10) **Figure S3.** Conformational analysis of simulated ligand-QscR *P. aeruginosa* protein complexes.
- 11) **Figure S4.** Conformational analysis of simulated ligand-CviR *C. violaceum* protein complexes.
- 12) **Figure S5.** The architecture of three bacterial LuxR-type quorum sensing transcription factors.
- 13) **Figure S6.** Superimposing the co-crystallized (magenta sticks) and redocked (yellow sticks) ligands

**Table S1.** Descriptive ligand-TraR *A. tumefaciens* binding interactions through directed flexible docking protocol

| Compound           | Ligand-target interaction description<br>[Type; Length (Å); Angle (°); Binding Residues]                                                                                                                                                                                                                                                                                                                                                                                          |
|--------------------|-----------------------------------------------------------------------------------------------------------------------------------------------------------------------------------------------------------------------------------------------------------------------------------------------------------------------------------------------------------------------------------------------------------------------------------------------------------------------------------|
| <b>Propranolol</b> | Polar ; 2.8 Å ; Asp70 (sidechain CO <sup>-</sup> with N <sup>+</sup> H <sub>2</sub> )<br>H-bond ; 3.1 Å ; 121 ° ; Tyr53 (sidechain OH with N <sup>+</sup> HH)<br>H-bond ; 1.9 Å ; 148 ° ; Thr129 (sidechain OH with propanol-OH)<br>$\pi$ - $\pi$ interaction ; 2.9 Å ; Tyr61<br>van der Waal ; 3.9 Å and 4.4 Å ; Gln58 sidechain C $\beta$ and C $\delta$                                                                                                                        |
| <b>Pindolol</b>    | Polar ; 2.7 Å ; Asp70 (sidechain CO <sup>-</sup> with N <sup>+</sup> H <sub>2</sub> )<br>H-bond ; 3.2 Å ; 159 ° ; Gln58 (mainchain C=O with indole NH)<br>H-bond ; 2.6 Å ; 127 ° ; Tyr61 (sidechain OH with propanol-OH)<br>$\pi$ - $\pi$ interaction ; 3.2 Å ; Tyr61                                                                                                                                                                                                             |
| <b>Timolol</b>     | Polar ; 3.3 Å ; Asp70 (sidechain CO <sup>-</sup> with N <sup>+</sup> H <sub>2</sub> )<br>H-bond ; 2.0 Å ; 140 ° ; Tyr53 (sidechain OH with propanol-OH)<br>H-bond ; 3.1 Å ; 155 ° ; Trp57 (sidechain NH with aryloxy-O)<br>H-bond ; 2.9 Å ; 167 ° ; Thr129 (sidechain OH with ring S)<br>$\pi$ -H interaction ; 4.1 Å ; Tyr61                                                                                                                                                     |
| <b>Atenolol</b>    | Polar ; 3.0 Å ; Asp70 (sidechain CO <sup>-</sup> with N <sup>+</sup> H <sub>2</sub> )<br>H-bond ; 1.8 Å ; 176 ° ; Tyr53 (sidechain OH with propanol-OH)<br>H-bond ; 2.9 Å ; 125 ° ; Gln58 (sidechain C=O with amide NH)<br>H-bond ; 3.1 Å ; 123 ° ; Tyr61 (sidechain OH with aryloxy-O)<br>H-bond ; 3.2 Å ; 135 ° ; Phe62 (mainchain NH with amide C=O)<br>H-bond ; 2.8 Å ; 121 ° ; Thr129 (sidechain OH with propanol-OH)<br>$\pi$ - $\pi$ interaction ; 3.1 Å ; Tyr61           |
| <b>Esmolol</b>     | Polar ; 2.8 Å ; Asp70 (sidechain CO <sup>-</sup> with N <sup>+</sup> H <sub>2</sub> )<br>H-bond ; 2.3 Å ; 174 ° ; Tyr53 (sidechain OH with aryloxy-O)<br>H-bond ; 3.2 Å ; 131 ° ; Tyr53 (mainchain NH with ester C=O)<br>H-bond ; 3.1 Å ; 121 ° ; Thr51 (sidechain OH with ester C=O)<br>H-bond ; 3.0 Å ; 125 ° ; Phe62 (mainchain NH with ester OCH <sub>3</sub> )<br>H-bond ; 2.8 Å ; 131 ° ; Thr129 (sidechain OH with aryloxy-O)<br>$\pi$ - $\pi$ interaction ; 4.0 Å ; Tyr61 |
| <b>Metoprolol</b>  | Polar ; 2.8 Å ; Asp70 (sidechain CO <sup>-</sup> with N <sup>+</sup> H <sub>2</sub> )<br>H-bond ; 2.9 Å ; 170 ° ; Tyr53 (sidechain OH with aryloxy-O)<br>H-bond ; 3.0 Å ; 128 ° ; Thr51 (sidechain C=O with amide NH)<br>H-bond ; 2.9 Å ; 120 ° ; Trp85 (mainchain NH with propanol-OH)<br>H-bond ; 2.7 Å ; 147 ° ; Thr129 (sidechain OH with terminal methoxy OCH <sub>3</sub> )<br>$\pi$ - $\pi$ interaction ; 3.2 Å ; Tyr61                                                    |
| <b>HLC</b>         | H-bond ; 3.2 Å ; 127 ° ; Asp70 (sidechain C=O with NH)<br>H-bond ; 2.1 Å ; 137 ° ; Tyr53 (sidechain OH with amide C=O)<br>H-bond ; 3.3 Å ; 153 ° ; Trp57 (sidechain NH with aryloxy-O)<br>H-bond ; 3.1 Å ; 120 ° ; Trp102 (sidechain OH with lactone C=O)<br>$\pi$ - $\pi$ interaction ; 4.1 Å ; Tyr61<br>van der Waal ; 3.5 Å and 4.8 Å ; Gln58 sidechain C $\beta$ and C $\delta$                                                                                               |

**Table S2.** Descriptive ligand-QscR *P. aeruginosa* binding interactions through directed flexible docking protocol

| Compound          | Ligand-target interaction description<br>[Type; Length (Å); Angle (°); Binding Residues]                                                                                                                                                                                                                                                                                                                                                                                                                                                                                                                                                                                                                                  |
|-------------------|---------------------------------------------------------------------------------------------------------------------------------------------------------------------------------------------------------------------------------------------------------------------------------------------------------------------------------------------------------------------------------------------------------------------------------------------------------------------------------------------------------------------------------------------------------------------------------------------------------------------------------------------------------------------------------------------------------------------------|
| <b>Atenolol</b>   | Polar ; 3.1 Å ; Asp75 (sidechain CO <sup>-</sup> with N <sup>+</sup> H <sub>2</sub> )<br>H-bond ; 2.6 Å ; 129 ° ; Ser38 (sidechain OH with aryloxy-O)<br>H-bond ; 3.3 Å ; 153 ° ; Tyr52 (sidechain OH with amide NHH)<br>H-bond ; 2.4 Å ; 154 ° ; Tyr58 (sidechain OH with propanol-OH)<br>H-bond ; 3.3 Å ; 137 ° ; Tyr66 (sidechain OH with propanol-OH)<br>$\pi$ -H interaction ; 3.0 Å ; Trp90<br>$\pi$ -H interaction ; 3.3 Å ; Trp102<br>van der Waals ; 3.6 Å ; Arg42 sidechain C $\beta$                                                                                                                                                                                                                           |
| <b>Esmolol</b>    | Polar ; 3.0 Å ; Asp75 (sidechain CO <sup>-</sup> with N <sup>+</sup> H <sub>2</sub> )<br>H-bond ; 2.1 Å ; 121 ° ; Ser38 (sidechain OH with propanol-OH)<br>H-bond ; 2.6 Å ; 132 ° ; Arg42 (mainchain NH with ester C=O)<br>H-bond ; 1.8 Å ; 147 ° ; Tyr58 (sidechain OH with propanol-OH)<br>H-bond ; 2.5 Å ; 129 ° ; Tyr66 (sidechain OH with aryloxy-O)<br>H-bond ; 2.7 Å ; 123 ° ; Ser129 (sidechain OH with propanol-OH)<br>$\pi$ - $\pi$ interaction ; 4.7 Å ; Phe54<br>$\pi$ -H interaction ; 3.2 Å ; Trp90                                                                                                                                                                                                         |
| <b>Betaxolol</b>  | Polar ; 3.3 Å ; Asp75 (sidechain CO <sup>-</sup> with N <sup>+</sup> H <sub>2</sub> )<br>H-bond ; 1.9 Å ; 137 ° ; Ser38 (sidechain OH with propanol-OH)<br>H-bond ; 1.7 Å ; 170 ° ; Tyr58 (sidechain OH with propanol-OH)<br>H-bond ; 2.2 Å ; 159 ° ; Tyr58 (sidechain OH with N <sup>+</sup> HH)<br>H-bond ; 3.2 Å ; 129 ° ; Tyr66 (sidechain OH with aryloxy-O)<br>H-bond ; 3.2 Å ; 128 ° ; Met127 (mainchain NH with terminal-O-linker)<br>$\pi$ - $\pi$ interaction ; 4.5 Å ; Phe54<br>$\pi$ -H interaction ; 3.4 Å ; Trp90                                                                                                                                                                                           |
| <b>Bisoprolol</b> | Polar ; 3.3 Å ; Asp75 (sidechain CO <sup>-</sup> with N <sup>+</sup> H <sub>2</sub> )<br>H-bond ; 2.5 Å ; 123 ° ; Ser38 (sidechain OH with aryloxy-O)<br>H-bond ; 2.6 Å ; 148 ° ; Ser38 (sidechain OH with propanol-OH)<br>H-bond ; 1.9 Å ; 120 ° ; Tyr58 (sidechain OH with propanol-OH)<br>H-bond ; 2.1 Å ; 124 ° ; Asp75 (sidechain C=O with N <sup>+</sup> HH)<br>H-bond ; 3.3 Å ; 121 ° ; Trp90 (sidechain NH with propanol-OH)<br>H-bond ; 3.0 Å ; 128 ° ; Ser129 (sidechain OH with aryloxy-O)<br>$\pi$ - $\pi$ interaction ; 4.4 Å ; Phe54<br>$\pi$ -H interaction ; 3.6 Å ; Tyr66<br>$\pi$ -H interaction ; 2.9 Å ; Trp90<br>van der Waal ; 3.7 Å and 4.2 Å ; Arg42 sidechain C $\beta$ and C $\delta$           |
| <b>Metoprolol</b> | Polar ; 3.1 Å ; Asp75 (sidechain CO <sup>-</sup> with N <sup>+</sup> H <sub>2</sub> )<br>H-bond ; 3.0 Å ; 137 ° ; Ser38 (sidechain OH with propanol-OH)<br>H-bond ; 3.3 Å ; 129 ° ; Arg42 (mainchain NH with terminal-O-linker)<br>H-bond ; 3.3 Å ; 124 ° ; Tyr52 (sidechain NH with propanol-OH)<br>H-bond ; 2.6 Å ; 170 ° ; Tyr58 (sidechain OH with N <sup>+</sup> HH)<br>H-bond ; 2.0 Å ; 128 ° ; Tyr58 (sidechain OH with propanol-OH)<br>H-bond ; 3.0 Å ; 127 ° ; Ser129 (sidechain OH with propanol-OH)<br>$\pi$ - $\pi$ interaction ; 4.9 Å ; Phe54<br>$\pi$ -H interaction ; 3.1 Å ; Trp90<br>$\pi$ -H interaction ; 3.5 Å ; Trp102<br>van der Waal ; 3.0 Å and 4.0 Å ; Arg42 sidechain C $\beta$ and C $\delta$ |
| <b>Acebutolol</b> | Polar ; 3.2 Å ; Asp75 (sidechain CO <sup>-</sup> with N <sup>+</sup> H <sub>2</sub> )<br>H-bond ; 1.9 Å ; 128 ° ; Ser38 (sidechain OH with aryloxy-O)                                                                                                                                                                                                                                                                                                                                                                                                                                                                                                                                                                     |

|                  |                                                                                                                                                                                                                                                                                                                                                                                                                                                                                                                                                                                                                                   |
|------------------|-----------------------------------------------------------------------------------------------------------------------------------------------------------------------------------------------------------------------------------------------------------------------------------------------------------------------------------------------------------------------------------------------------------------------------------------------------------------------------------------------------------------------------------------------------------------------------------------------------------------------------------|
|                  | H-bond ; 2.1 Å ; 127 ° ; Ser38 (sidechain OH with propanol-OH)<br>H-bond ; 1.7 Å ; 154 ° ; Tyr58 (sidechain OH with propanol-OH)<br>H-bond ; 3.0 Å ; 137 ° ; Thr72 (mainchain NH with acetyl C=O)<br>H-bond ; 1.8 Å ; 157 ° ; Asp75 (sidechain C=O with N <sup>+</sup> HH)<br>H-bond ; 3.3 Å ; 124 ° ; Met127 (mainchain NH with terminal amide C=O)<br>H-bond ; 3.0 Å ; 137 ° ; Ser129 (sidechain OH with propanol-OH)<br>$\pi$ - $\pi$ interaction ; 4.0 Å ; Phe54<br>$\pi$ -H interaction ; 2.9 Å ; Tyr66<br>$\pi$ -H interaction ; 2.9 Å ; Trp90<br>van der Waal ; 3.7 Å and 4.3 Å ; Arg42 sidechain C $\beta$ and C $\delta$ |
| <b>Labetalol</b> | H-bond ; 1.8 Å ; 149 ° ; Ser38 (sidechain OH with ethanol-OH)<br>H-bond ; 3.3 Å ; 137 ° ; Tyr58 (sidechain OH with ethanol-OH)<br>H-bond ; 2.3 Å ; 123 ° ; Trp62 (mainchain NH with carbamide C=O)<br>$\pi$ - $\pi$ interaction ; 3.3 Å ; Tyr52<br>$\pi$ -H interaction ; 3.0 Å ; Phe54<br>$\pi$ -H interaction ; 3.2 Å ; Tyr58<br>$\pi$ -H interaction ; 2.5 Å ; Tyr66<br>van der Waal ; 3.3 Å ; Arg42 sidechain C $\beta$                                                                                                                                                                                                       |
| <b>HLC</b>       | H-bond ; 2.8 Å ; 128 ° ; Ser38 (sidechain OH with amide C=O)<br>H-bond ; 2.1 Å ; 148 ° ; Tyr58 (sidechain NH with aryloxy-O)<br>H-bond ; 2.0 Å ; 147 ° ; Trp62 (sidechain NH with lactone C=O)<br>H-bond ; 2.6 Å ; 149 ° ; Tyr66 (sidechain OH with amide C=O)<br>H-bond ; 2.4 Å ; 129 ° ; Asp75 (sidechain OH with amide C=O)<br>$\pi$ - $\pi$ interaction ; 4.5 Å ; Phe54<br>$\pi$ -H interaction ; 2.7 Å ; Trp90<br>van der Waal ; 4.6 Å ; Arg42 sidechain C $\beta$                                                                                                                                                           |

**Table S3.** Descriptive ligand-CviR *C. violaceum* binding interactions through directed flexible docking protocol

| Compound          | Ligand-target interaction description<br>[Type; Length (Å); Angle (°); Binding Residues]                                                                                                                                                                                                                                                                                                                                                                                                                                                                                 |
|-------------------|--------------------------------------------------------------------------------------------------------------------------------------------------------------------------------------------------------------------------------------------------------------------------------------------------------------------------------------------------------------------------------------------------------------------------------------------------------------------------------------------------------------------------------------------------------------------------|
| <b>Pindolol</b>   | Polar ; 3.0 Å ; Asp97 (sidechain CO <sup>-</sup> with N <sup>+</sup> H <sub>2</sub> )<br>H-bond ; 3.1 Å ; 141 ° ; Tyr80 (sidechain OH with aryloxy-O)<br>H-bond ; 3.3 Å ; 162 ° ; Tyr80 (sidechain OH with propanol-OH)<br>H-bond ; 3.2 Å ; 164 ° ; Asp97 (sidechain C=O with N <sup>+</sup> HH)<br>H-bond ; 2.5 Å ; 125 ° ; Ser155 (sidechain OH with propanol-OH)<br>$\pi$ - $\pi$ interaction ; 4.2 Å ; Tyr80<br>$\pi$ - $\pi$ interaction ; 3.7 Å ; Tyr88<br>$\pi$ -H interaction ; 3.4 Å ; Trp111                                                                   |
| <b>Atenolol</b>   | Polar ; 3.2 Å ; Asp97 (sidechain CO <sup>-</sup> with N <sup>+</sup> H <sub>2</sub> )<br>H-bond ; 2.5 Å ; 163 ° ; Tyr80 (sidechain OH with propanol-OH)<br>H-bond ; 3.1 Å ; 144 ° ; Met89 (sidechain SCH <sub>3</sub> with terminal amide NHH)<br>H-bond ; 3.3 Å ; 128 ° ; Asp97 (sidechain C=O with N <sup>+</sup> HH)<br>H-bond ; 2.5 Å ; 126 ° ; Ser155 (sidechain OH with propanol-OH)<br>H-bond ; 3.3 Å ; 125 ° ; Met253 (sidechain SCH <sub>3</sub> with terminal amide NHH)<br>$\pi$ - $\pi$ interaction ; 3.6 Å ; Tyr88<br>$\pi$ -H interaction ; 2.9 Å ; Trp111 |
| <b>Esmolol</b>    | Polar ; 2.7 Å ; Asp97 (sidechain CO <sup>-</sup> with N <sup>+</sup> H <sub>2</sub> )<br>H-bond ; 3.1 Å ; 171 ° ; Tyr80 (sidechain OH with propanol-OH)<br>H-bond ; 2.9 Å ; 174 ° ; Asp97 (sidechain C=O with N <sup>+</sup> HH)<br>H-bond ; 2.7 Å ; 129 ° ; Ser155 (sidechain OH with propanol-OH)<br>$\pi$ - $\pi$ interaction ; 3.7 Å ; Tyr88<br>$\pi$ -H interaction ; 3.2 Å ; Trp111                                                                                                                                                                                |
| <b>Betaxolol</b>  | Polar ; 3.1 Å ; Asp97 (sidechain CO <sup>-</sup> with N <sup>+</sup> H <sub>2</sub> )<br>H-bond ; 3.3 Å ; 161 ° ; Tyr80 (sidechain OH with propanol-OH)<br>H-bond ; 3.2 Å ; 150 ° ; Asp97 (sidechain C=O with N <sup>+</sup> HH)<br>H-bond ; 1.9 Å ; 149 ° ; Asp97 (sidechain CO <sup>-</sup> with propanol-OH)<br>$\pi$ - $\pi$ interaction ; 3.9 Å ; Tyr88<br>$\pi$ -H interaction ; 3.0 Å ; Trp111                                                                                                                                                                    |
| <b>Bisoprolol</b> | Polar ; 2.7 Å ; Asp97 (sidechain CO <sup>-</sup> with N <sup>+</sup> H <sub>2</sub> )<br>H-bond ; 3.2 Å ; 172 ° ; Tyr80 (sidechain OH with propanol-OH)<br>H-bond ; 3.1 Å ; 164 ° ; Asp97 (sidechain C=O with N <sup>+</sup> HH)<br>H-bond ; 3.1 Å ; 126 ° ; Ser155 (sidechain OH with propanol-OH)<br>$\pi$ - $\pi$ interaction ; 4.3 Å ; Tyr88<br>$\pi$ -H interaction ; 3.3 Å ; Trp111                                                                                                                                                                                |
| <b>Metoprolol</b> | Polar ; 2.8 Å ; Asp97 (sidechain CO <sup>-</sup> with N <sup>+</sup> H <sub>2</sub> )<br>H-bond ; 3.3 Å ; 162 ° ; Tyr80 (sidechain OH with propanol-OH)<br>H-bond ; 3.3 Å ; 158 ° ; Asp97 (sidechain C=O with N <sup>+</sup> HH)<br>H-bond ; 2.2 Å ; 134 ° ; Ser155 (sidechain OH with propanol-OH)<br>$\pi$ - $\pi$ interaction ; 3.8 Å ; Tyr88<br>$\pi$ -H interaction ; 3.0 Å ; Trp111                                                                                                                                                                                |
| <b>Acebutolol</b> | Polar ; 3.3 Å ; Asp97 (sidechain CO <sup>-</sup> with N <sup>+</sup> H <sub>2</sub> )<br>H-bond ; 3.2 Å ; 142 ° ; Tyr80 (sidechain OH with aryloxy-O)<br>H-bond ; 3.3 Å ; 165 ° ; Trp84 (sidechain NH with propanol-OH)<br>H-bond ; 2.9 Å ; 128 ° ; Tyr88 (sidechain OH with propanol-OH)<br>H-bond ; 1.6 Å ; 168 ° ; Asp97 (sidechain C=O with propanol-OH)<br>$\pi$ - $\pi$ interaction ; 4.5 Å ; Tyr80<br>$\pi$ - $\pi$ interaction ; 3.8 Å ; Tyr88<br>$\pi$ -H interaction ; 3.2 Å ; Trp111                                                                          |
| <b>Labetalol</b>  | Polar ; 2.2 Å ; Asp97 (sidechain CO <sup>-</sup> with N <sup>+</sup> H <sub>2</sub> )<br>H-bond ; 3.3 Å ; 162 ° ; Tyr80 (sidechain OH with ethanol-OH)                                                                                                                                                                                                                                                                                                                                                                                                                   |

|            |                                                                                                                                                                                                                                                                                                                                                                          |
|------------|--------------------------------------------------------------------------------------------------------------------------------------------------------------------------------------------------------------------------------------------------------------------------------------------------------------------------------------------------------------------------|
|            | H-bond ; 2.4 Å ; 162 ° ; Trp84 (sidechain NH with phenyl-4-OH)<br>H-bond ; 2.1 Å ; 158 ° ; Asp97 (sidechain C=O with N+HH)<br>H-bond ; 3.2 Å ; 134 ° ; Met135 (sidechain SCH <sub>3</sub> with phenyl-4-OH)<br>π-H interaction ; 3.8 Å ; Tyr88<br>π-π interaction ; 3.0 Å ; Trp111                                                                                       |
| <b>HLC</b> | H-bond ; 2.5 Å ; 158 ° ; Tyr80 (sidechain OH with amide C=O)<br>H-bond ; 2.0 Å ; 169 ° ; Trp84 (sidechain NH with lactone C=O)<br>H-bond ; 2.8 Å ; 121 ° ; Trp84 (sidechain NH with lactone O)<br>H-bond ; 2.3 Å ; 161 ° ; Asp97 (sidechain C=O with amide NH)<br>π-H interaction ; 4.0 Å ; Tyr80<br>π-π interaction ; 5.1 Å ; Tyr88<br>π-H interaction ; 2.8 Å ; Trp111 |

**Table S4.** Estimated  $\Delta\text{RMSF}^a$  values for ligand-TraR *A. tumefaciens* proteins along the whole MD simulation.

| Pocket Residues | HLC         | Comp.1      | Comp.2      | Comp.8      | Comp.10     | Comp.11     | Comp.14     |
|-----------------|-------------|-------------|-------------|-------------|-------------|-------------|-------------|
| Ala38           | -0.08       | -0.29       | -0.15       | 0.08        | 0.26        | 0.10        | 0.22        |
| Tyr39           | 0.06        | -0.1        | 0.03        | 0.21        | <b>0.35</b> | 0.16        | 0.27        |
| Leu40           | 0.18        | -0.03       | 0.10        | 0.1         | <b>0.36</b> | 0.05        | 0.20        |
| Thr51           | <b>0.53</b> | 0.23        | <b>0.39</b> | <b>0.71</b> | <b>0.92</b> | <b>0.67</b> | <b>0.73</b> |
| Tyr53           | <b>0.31</b> | -0.18       | 0.01        | <b>0.38</b> | <b>0.62</b> | 0.24        | <b>0.72</b> |
| Trp57           | -0.23       | -0.63       | -0.64       | -0.17       | 0.11        | -0.39       | -0.01       |
| Tyr61           | -0.59       | -0.98       | -1.07       | -0.70       | -0.56       | -0.91       | -0.61       |
| Phe62           | -1.04       | -1.47       | -1.61       | -1.18       | -0.97       | -1.39       | -1.15       |
| Asp70           | 0.19        | <b>0.32</b> | 0.25        | <b>0.37</b> | <b>0.50</b> | 0.27        | <b>0.51</b> |
| Val72           | <b>0.61</b> | <b>0.60</b> | <b>0.45</b> | -0.26       | <b>0.62</b> | <b>0.29</b> | <b>0.46</b> |
| Trp85           | -0.26       | -0.29       | -0.14       | -0.93       | 0.16        | -0.22       | -0.01       |
| Phe101          | <b>0.35</b> | <b>0.64</b> | <b>0.36</b> | <b>0.31</b> | <b>0.51</b> | <b>0.46</b> | <b>0.55</b> |
| Tyr102          | <b>0.49</b> | <b>0.73</b> | <b>0.63</b> | <b>0.31</b> | <b>0.73</b> | <b>0.35</b> | <b>0.67</b> |
| Ala105          | <b>1.27</b> | <b>1.39</b> | <b>1.40</b> | <b>1.25</b> | <b>1.60</b> | <b>1.36</b> | <b>1.56</b> |
| Ile110          | <b>1.08</b> | <b>1.12</b> | <b>1.29</b> | <b>1.06</b> | <b>1.55</b> | <b>1.31</b> | <b>1.47</b> |
| Thr115          | <b>1.48</b> | <b>1.53</b> | <b>1.55</b> | <b>1.36</b> | <b>1.69</b> | <b>1.55</b> | <b>1.58</b> |
| Met127          | -0.09       | -0.05       | -0.06       | -0.05       | 0.07        | -0.10       | -0.06       |
| Phe128          | -0.25       | -0.25       | -0.17       | -0.06       | 0.08        | -0.09       | -0.05       |
| Thr129          | -0.38       | -0.36       | -0.28       | -0.31       | 0.00        | -0.16       | -0.11       |

<sup>a</sup> Relative difference root-mean-square fluctuation ( $\Delta\text{RMSF}$ ) was estimated for each ligand-associated TraR protein relative to the apo/unliganded state. Residues showing significant immobility are with  $\Delta\text{RMSF} > 0.30$  Å cut-off are in bold red color and highlighted.

**Table S5.** Estimated  $\Delta\text{RMSF}^a$  values for ligand-QscR *P. aeruginosa* proteins along the whole MD simulation.

| Pocket Residues | HLC         | Comp.10     | Comp.11     | Comp.12     | Comp.13     | Comp.14     | Comp.17     | Comp.21     |
|-----------------|-------------|-------------|-------------|-------------|-------------|-------------|-------------|-------------|
| Ser38           | 0.18        | 0.08        | <b>0.37</b> | <b>0.37</b> | 0.21        | 0.12        | <b>0.35</b> | 0.27        |
| Phe39           | 0.00        | -0.10       | <b>0.32</b> | <b>0.31</b> | 0.15        | 0.08        | 0.18        | 0.19        |
| Gly40           | -0.05       | -0.46       | 0.11        | 0.14        | -0.13       | -0.03       | 0.07        | -0.11       |
| Ala41           | 0.14        | -0.04       | 0.27        | <b>0.31</b> | 0.17        | 0.14        | 0.26        | 0.17        |
| Arg42           | 0.02        | 0.13        | <b>0.34</b> | <b>0.34</b> | <b>0.32</b> | <b>0.30</b> | <b>0.33</b> | 0.06        |
| Tyr52           | -0.64       | -0.61       | -0.33       | -0.34       | -0.25       | -0.14       | -0.24       | -0.98       |
| His53           | -0.25       | -0.44       | -0.16       | -0.18       | -0.26       | -0.22       | -0.15       | -0.59       |
| Phe54           | -0.44       | -0.41       | -0.20       | -0.11       | -0.36       | -0.28       | -0.21       | -0.32       |
| Ser56           | -0.51       | -0.25       | 0.02        | -0.04       | -0.14       | -0.25       | -0.08       | -0.10       |
| Tyr58           | -0.10       | -0.21       | 0.11        | -0.12       | -0.09       | -0.31       | 0.13        | -0.10       |
| Trp62           | -0.08       | 0.03        | 0.28        | <b>0.32</b> | 0.01        | 0.02        | <b>0.44</b> | 0.19        |
| Lys63           | -0.40       | -0.42       | -0.03       | -0.13       | -0.71       | -0.22       | 0.08        | -0.12       |
| Tyr66           | -0.77       | -0.49       | -0.20       | -0.18       | -0.81       | -0.04       | 0.00        | -0.30       |
| Ile67           | -1.19       | -0.89       | -0.43       | -0.53       | -1.49       | -0.33       | -0.19       | -0.69       |
| Thr72           | -0.88       | -1.01       | -0.57       | -0.64       | -1.30       | -0.37       | -0.41       | -0.54       |
| Asp75           | <b>0.31</b> | <b>0.43</b> | <b>0.31</b> | <b>0.37</b> | <b>0.47</b> | 0.28        | 0.25        | 0.07        |
| Ile77           | <b>0.31</b> | 0.13        | <b>0.45</b> | <b>0.43</b> | 0.13        | <b>0.32</b> | <b>0.40</b> | <b>0.41</b> |
| Val78           | <b>0.37</b> | 0.18        | <b>0.59</b> | <b>0.54</b> | 0.24        | <b>0.46</b> | <b>0.51</b> | <b>0.47</b> |
| Leu82           | <b>0.36</b> | <b>0.33</b> | <b>0.53</b> | <b>0.47</b> | 0.19        | <b>0.40</b> | <b>0.53</b> | 0.07        |
| Trp90           | <b>0.34</b> | <b>0.37</b> | <b>0.43</b> | <b>0.47</b> | <b>0.35</b> | 0.22        | <b>0.45</b> | <b>0.49</b> |
| Phe101          | -0.49       | -0.20       | -0.07       | 0.06        | -0.12       | -0.13       | 0.10        | 0.12        |
| Trp102          | -0.11       | 0.11        | 0.24        | <b>0.35</b> | 0.22        | 0.14        | <b>0.38</b> | <b>0.48</b> |
| Ala105          | -0.58       | -0.45       | -0.23       | -0.17       | -0.30       | -0.62       | -0.16       | -0.19       |
| Ile110          | -0.05       | 0.06        | 0.25        | 0.26        | 0.12        | -0.23       | <b>0.32</b> | 0.25        |
| Ile125          | <b>0.74</b> | <b>0.63</b> | <b>0.86</b> | <b>0.88</b> | <b>0.67</b> | <b>0.71</b> | <b>0.88</b> | <b>0.74</b> |
| Met127          | <b>0.82</b> | <b>0.55</b> | <b>0.93</b> | <b>0.98</b> | <b>0.79</b> | <b>0.73</b> | <b>0.93</b> | <b>0.86</b> |
| Ser129          | <b>0.91</b> | <b>0.72</b> | <b>1.02</b> | <b>1.01</b> | <b>0.84</b> | <b>0.77</b> | <b>1.01</b> | <b>0.92</b> |

<sup>a</sup> Relative difference root-mean-square fluctuation ( $\Delta\text{RMSF}$ ) was estimated for each ligand-associated QscR protein relative to the apo/unliganded state. Residues showing significant immobility are with  $\Delta\text{RMSF} > 0.30$  Å cut-off are in bold red color and highlighted.



**Table S6.** Estimated  $\Delta\text{RMSF}^a$  values for ligand-CviR *C. violaceum* proteins along the whole MD simulation.

| Pocket Residues | HLC         | Comp.2      | Comp.10     | Comp.11     | Comp.12     | Comp.13     | Comp.14     | Comp.17     | Comp.21     |
|-----------------|-------------|-------------|-------------|-------------|-------------|-------------|-------------|-------------|-------------|
| Leu57           | <b>0.80</b> | <b>0.96</b> | <b>0.43</b> | <b>0.59</b> | <b>0.56</b> | <b>0.70</b> | <b>0.49</b> | <b>0.70</b> | <b>0.32</b> |
| Ile69           | -0.72       | -0.62       | -0.29       | -0.49       | -0.60       | -0.71       | -0.51       | -0.41       | -0.85       |
| Gln70           | -0.87       | -0.75       | -0.49       | -0.78       | -0.62       | -0.90       | -0.78       | -0.62       | -1.25       |
| Arg71           | -0.70       | -0.66       | -0.43       | -0.54       | -0.48       | -0.78       | -0.64       | -0.51       | -1.16       |
| Leu72           | 0.18        | 0.28        | 0.25        | 0.22        | 0.13        | 0.26        | 0.28        | 0.18        | 0.13        |
| Val75           | -0.14       | -0.08       | 0.23        | 0.18        | -0.40       | 0.02        | 0.21        | <b>0.36</b> | 0.12        |
| Asn77           | -0.72       | -0.62       | -0.29       | -0.49       | -0.6        | -0.71       | -0.51       | -0.41       | -0.85       |
| Tyr80           | <b>0.49</b> | <b>0.53</b> | <b>0.93</b> | <b>0.74</b> | <b>0.32</b> | <b>0.72</b> | <b>0.88</b> | <b>1.00</b> | <b>0.94</b> |
| Trp84           | 0.26        | 0.08        | <b>0.61</b> | 0.28        | 0.15        | <b>0.30</b> | <b>0.53</b> | <b>0.47</b> | <b>0.46</b> |
| Leu85           | <b>0.31</b> | 0.04        | <b>0.57</b> | 0.04        | 0.02        | 0.28        | <b>0.40</b> | <b>0.36</b> | <b>0.63</b> |
| Tyr88           | 0.10        | <b>0.64</b> | 0.06        | <b>0.41</b> | <b>0.43</b> | 0.05        | 0.07        | 0.12        | <b>0.36</b> |
| Met89           | <b>0.52</b> | 0.10        | <b>0.56</b> | 0.10        | 0.01        | <b>0.40</b> | <b>0.40</b> | <b>0.43</b> | <b>0.68</b> |
| Ala94           | 0.23        | -0.51       | 0.04        | -0.06       | -0.31       | -0.23       | 0.26        | -0.17       | 0.21        |
| Gln95           | 0.25        | -0.41       | 0.20        | -0.07       | -0.34       | -0.17       | 0.27        | 0.12        | 0.16        |
| Asp97           | <b>0.43</b> | <b>1.07</b> | <b>0.53</b> | <b>0.98</b> | <b>1.18</b> | <b>0.83</b> | <b>0.50</b> | <b>0.67</b> | 0.29        |
| Pro98           | -0.37       | -0.84       | -0.39       | -0.82       | -0.99       | -0.74       | -0.50       | -0.47       | -0.53       |
| Ile99           | <b>0.44</b> | <b>0.83</b> | <b>0.64</b> | <b>0.49</b> | <b>1.05</b> | 0.28        | <b>0.73</b> | 0.28        | <b>0.62</b> |
| Leu100          | <b>0.29</b> | <b>0.32</b> | <b>0.70</b> | 0.29        | <b>1.07</b> | <b>0.30</b> | 0.28        | 0.27        | <b>1.00</b> |
| Arg101          | -0.67       | -0.93       | -0.50       | -0.89       | -0.83       | -0.81       | -0.62       | -0.78       | -0.79       |
| Trp111          | <b>1.25</b> | <b>0.96</b> | <b>0.66</b> | <b>0.36</b> | <b>0.60</b> | <b>0.68</b> | <b>0.75</b> | <b>0.87</b> | <b>0.61</b> |
| Phe115          | 0.21        | <b>0.30</b> | <b>0.43</b> | <b>0.49</b> | <b>0.51</b> | <b>0.32</b> | <b>0.49</b> | <b>0.33</b> | <b>0.38</b> |
| Phe126          | -0.70       | -1.33       | -0.41       | -1.07       | -1.25       | -0.72       | -0.97       | -0.97       | -0.80       |
| Ala130          | -0.55       | -1.09       | -0.25       | -0.99       | -1.12       | -0.61       | -0.77       | -0.46       | -0.52       |
| Met135          | -0.16       | -0.59       | 0.14        | -0.59       | -0.57       | -0.27       | -0.36       | 0.16        | 0.02        |
| Thr140          | -0.81       | -1.16       | -0.52       | -1.08       | -1.07       | -0.84       | -1.11       | -0.77       | -0.71       |
| Ile153          | <b>1.38</b> | <b>1.59</b> | <b>0.78</b> | <b>1.16</b> | <b>1.08</b> | <b>1.23</b> | <b>1.24</b> | <b>1.17</b> | <b>1.31</b> |
| Ser155          | <b>0.84</b> | <b>0.71</b> | <b>0.38</b> | -0.04       | <b>0.65</b> | <b>0.66</b> | -0.21       | -0.03       | -0.21       |
| Val250          | <b>1.31</b> | 0.22        | 0.08        | <b>2.37</b> | <b>0.52</b> | <b>0.64</b> | <b>1.41</b> | <b>0.85</b> | <b>0.38</b> |

<sup>a</sup> Relative difference root-mean-square fluctuation ( $\Delta\text{RMSF}$ ) was estimated for each ligand-associated CviR protein relative to the apo/unliganded state. Residues showing significant immobility are with  $\Delta\text{RMSF} > 0.30$  Å cut-off are in bold red color and highlighted.

**Table S7.** Sequences of the used primers in this study

| Target gene | Sequence (5'–3')                                                   | Reference |
|-------------|--------------------------------------------------------------------|-----------|
| <i>lasI</i> | For: CTACAGCCTGCAGAACGACA<br>Rev: ATCTGGGTCTTGGCATTGAG             | [1]       |
| <i>lasR</i> | For: ACGCTCAAGTGGAAAATTGG<br>Rev: GTAGATGGACGGTCCCAGA              | [1]       |
| <i>rhlI</i> | For: CTCTCTGAATCGCTGGAAGG<br>Rev: GACGTCCTTGAGCAGGTAGG             | [2]       |
| <i>rhlR</i> | For: AGGAATGACGGAGGCTTTTT<br>Rev: CCCGTAGTTCTGCATCTGGT             | [1]       |
| <i>pqsA</i> | For: TTCTGTTCCGCCTCGATTTC<br>Rev: AGTCGTTCAACGCCAGCAC              | [1]       |
| <i>pqsR</i> | For: AACCTGGAAATCGACCTGTG<br>Rev: TGAAATCGTCGAGCAGTACG             | [1]       |
| <i>rpoD</i> | For: GGGCGAAGAAGGAAATGGTC<br>Rev: CAGGTGGCGTAGGTGGAGAAC            | [1]       |
| <i>qseC</i> | For: GGTACCAAATTGACGCAACGTCTCAG<br>Rev: GAATTCGCCCAACTTACTACGGCCTC | [3]       |
| <i>qseE</i> | For: GGTACCAGCGACACGTTGAAGCGC<br>Rev: GAATTCGCGTGTTTGTGTCAGATGCAGG | [3]       |
| <i>gyrB</i> | For: GTGATCAGCGTCGCCACT<br>Rev: GCGCGGTGATCAGCGTC                  | [4]       |

## References

1. Hegazy, W. A. H.; Khayat, M. T.; Ibrahim, T. S.; Nassar, M. S.; Bakhrebah, M. A.; Abdulaal, W. H.; Alhakamy, N. A.; Bendary, M. M., Repurposing Anti-diabetic Drugs to Cripple Quorum Sensing in *Pseudomonas aeruginosa*. *Microorganisms* **2020**, 8, (9).
2. Aldawsari, M. F.; Khafagy, E. S.; Saqr, A. A.; Alalaiwe, A.; Abbas, H. A.; Shaldam, M. A.; Hegazy, W. A. H.; Goda, R. M., Tackling Virulence of *Pseudomonas aeruginosa* by the Natural Furanone Sotolon. *Antibiotics (Basel)* **2021**, 10, (7).
3. Moreira, C. G.; Sperandio, V., Interplay between the QseC and QseE bacterial adrenergic sensor kinases in *Salmonella enterica* serovar Typhimurium pathogenesis. *Infect Immun* **2012**, 80, (12), 4344-53.
4. Askoura, M.; Hegazy, W. A. H., Ciprofloxacin interferes with *Salmonella* Typhimurium intracellular survival and host virulence through repression of *Salmonella* pathogenicity island-2 (SPI-2) genes expression. *Pathog Dis* **2020**, 78, (1).

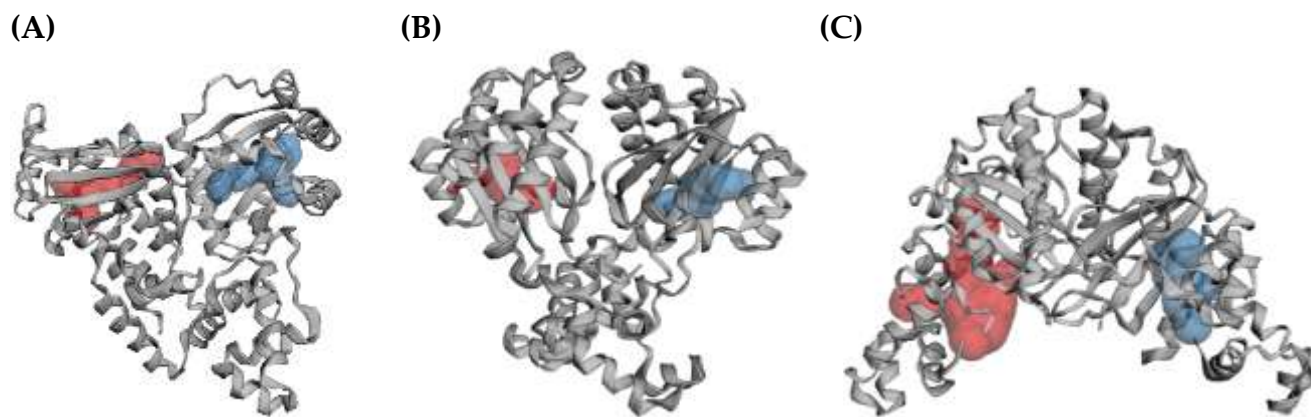

**Figure S1.** 3D-representation of the binding site topology at the three bacterial LuxR-type quorum-sensing transcription factors. (A) TraR *Agrobacterium tumefaciens*; (B) QscR *Pseudomonas aeruginosa*; (C) CviR *Chromobacterium violaceum*. Putative pockets were calculated via the on-line Computed Atlas of Surface Topography of proteins (CASTp; <http://sts.bioe.uic.edu/castp/index.html>) using 1.4 Å radius probe, visualized as surface 3D-representation, and colored in different colors (blue and red) for each target protomer. Estimated pocket area and volume were analytically calculated using the Richard's solvent-accessible surface model.

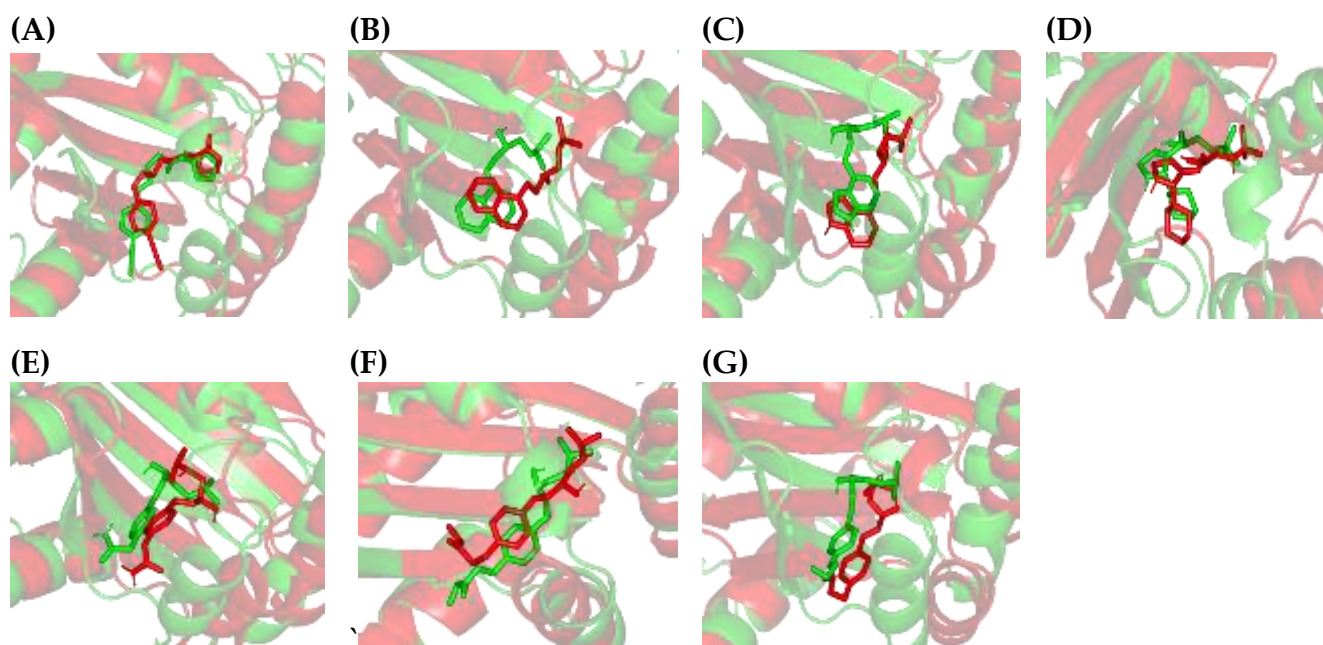

**Figure S2.** Conformational analysis of simulated ligand-TraR *A. tumefaciens* protein complexes. (A) HLC; (B) Comp.1; (C) Comp.2; (D) Comp.8; (E) Comp.10; (F) Comp.11; (G) Comp.14. Overlaid snapshots of the ligand-protein complex at 0 ns and 100 ns of the MD simulation runs. The TraR *A. tumefaciens* proteins are represented in green and red cartoon 3D-representation corresponding to initial and last extracted frames, respectively. Ligands (sticks) are presented in colors corresponding to their respective extracted frames.

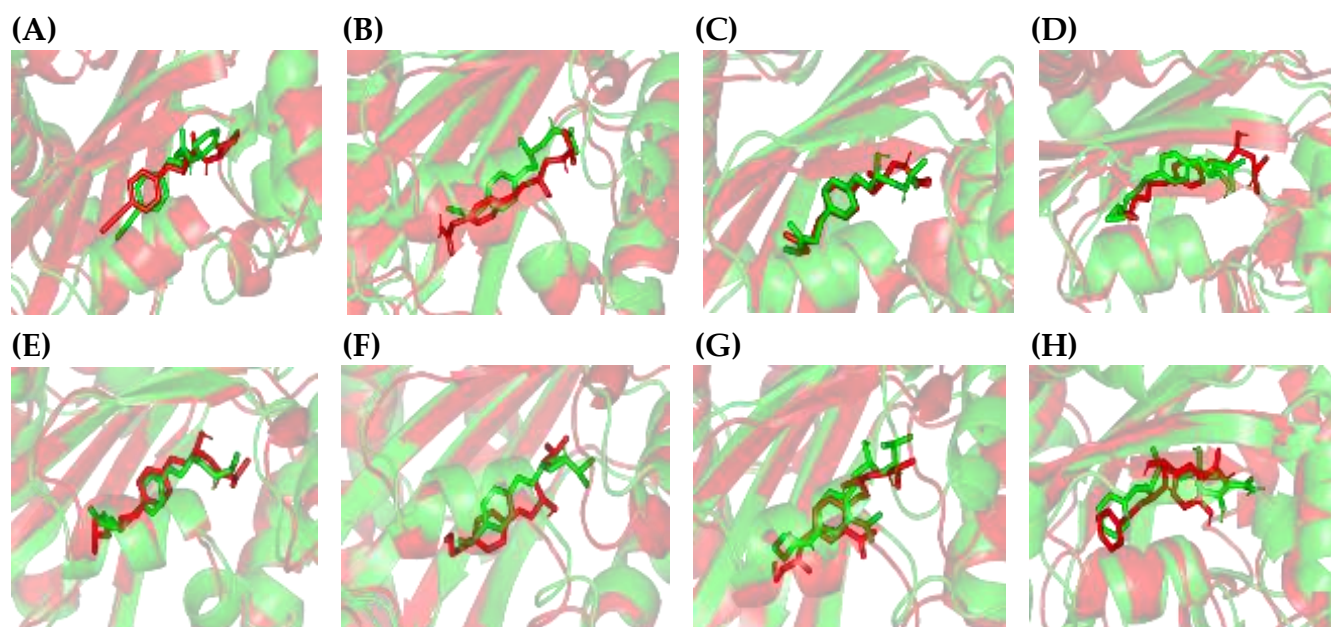

**Figure S3.** Conformational analysis of simulated ligand-QscR *P. aeruginosa* protein complexes. (A) HLC; (B) Comp.10; (C) Comp.11 (D) Comp.12; (E) Comp.13; (F) Comp.14; (G) Comp.17; (H) Comp.21. Overlaid snapshots of the ligand-protein complex at 0 ns and 100 ns of the MD simulation runs. The QscR *P. aeruginosa* proteins are represented in green and red cartoon 3D-representation corresponding to initial and last extracted frames, respectively. Ligands (sticks) are presented in colors corresponding to their respective extracted frames.

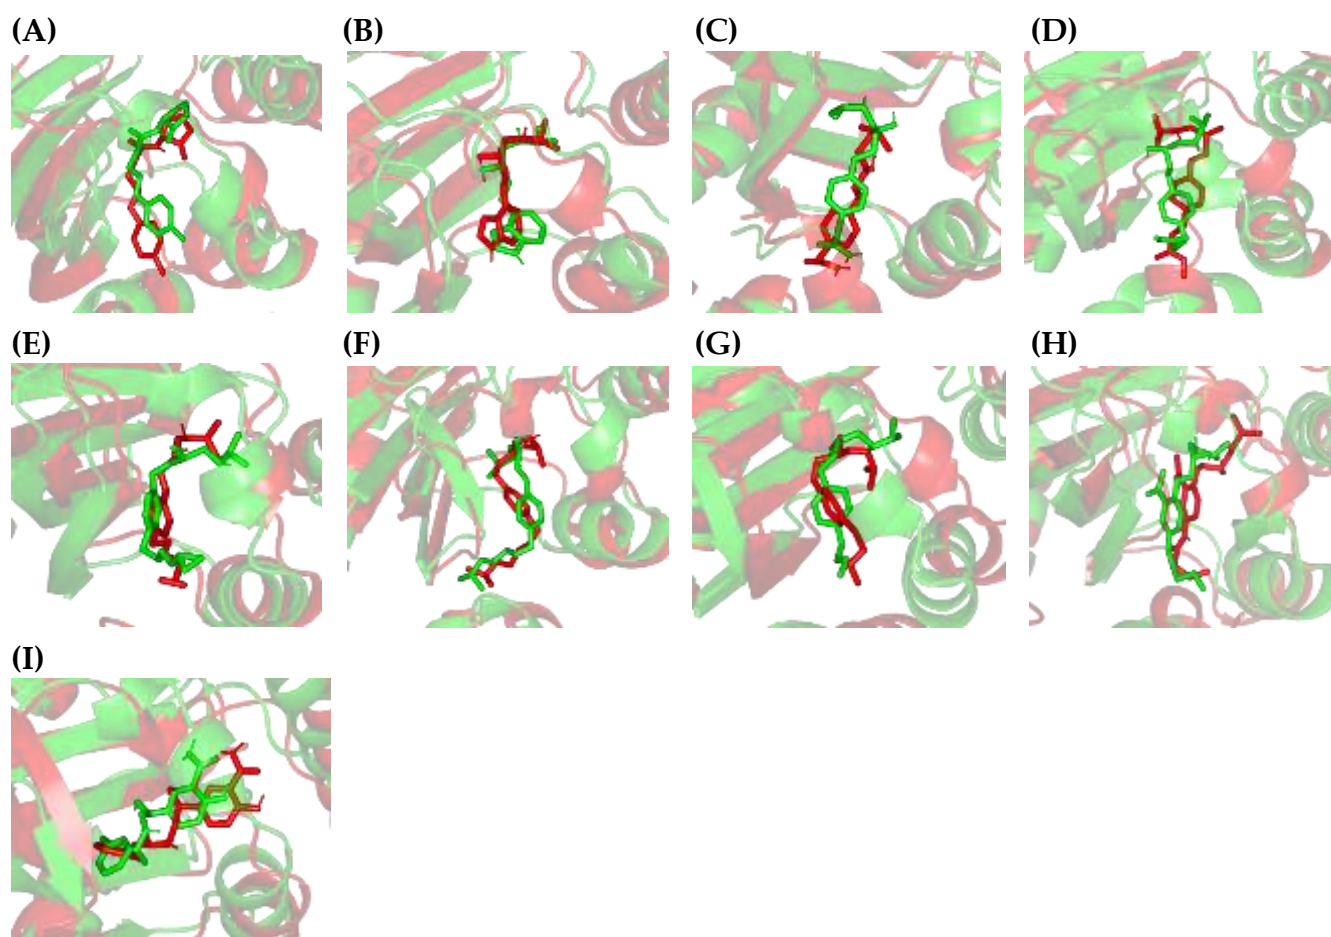

**Figure S4.** Conformational analysis of simulated ligand-CviR *C. violaceum* protein complexes. (A) HLC; (B) Comp.2; (C) Comp.10 (D) Comp.11; (E) Comp.12; (F) Comp.13; (G) Comp.14; (H) Comp.17; (I) Comp.21. Overlaid snapshots of the ligand-protein complex at 0 ns and 100 ns of the MD simulation runs. The CviR *C. violaceum* proteins are represented in green and red cartoon 3D-representation corresponding to initial and last extracted frames, respectively. Ligands (sticks) are presented in colors corresponding to their respective extracted frames.



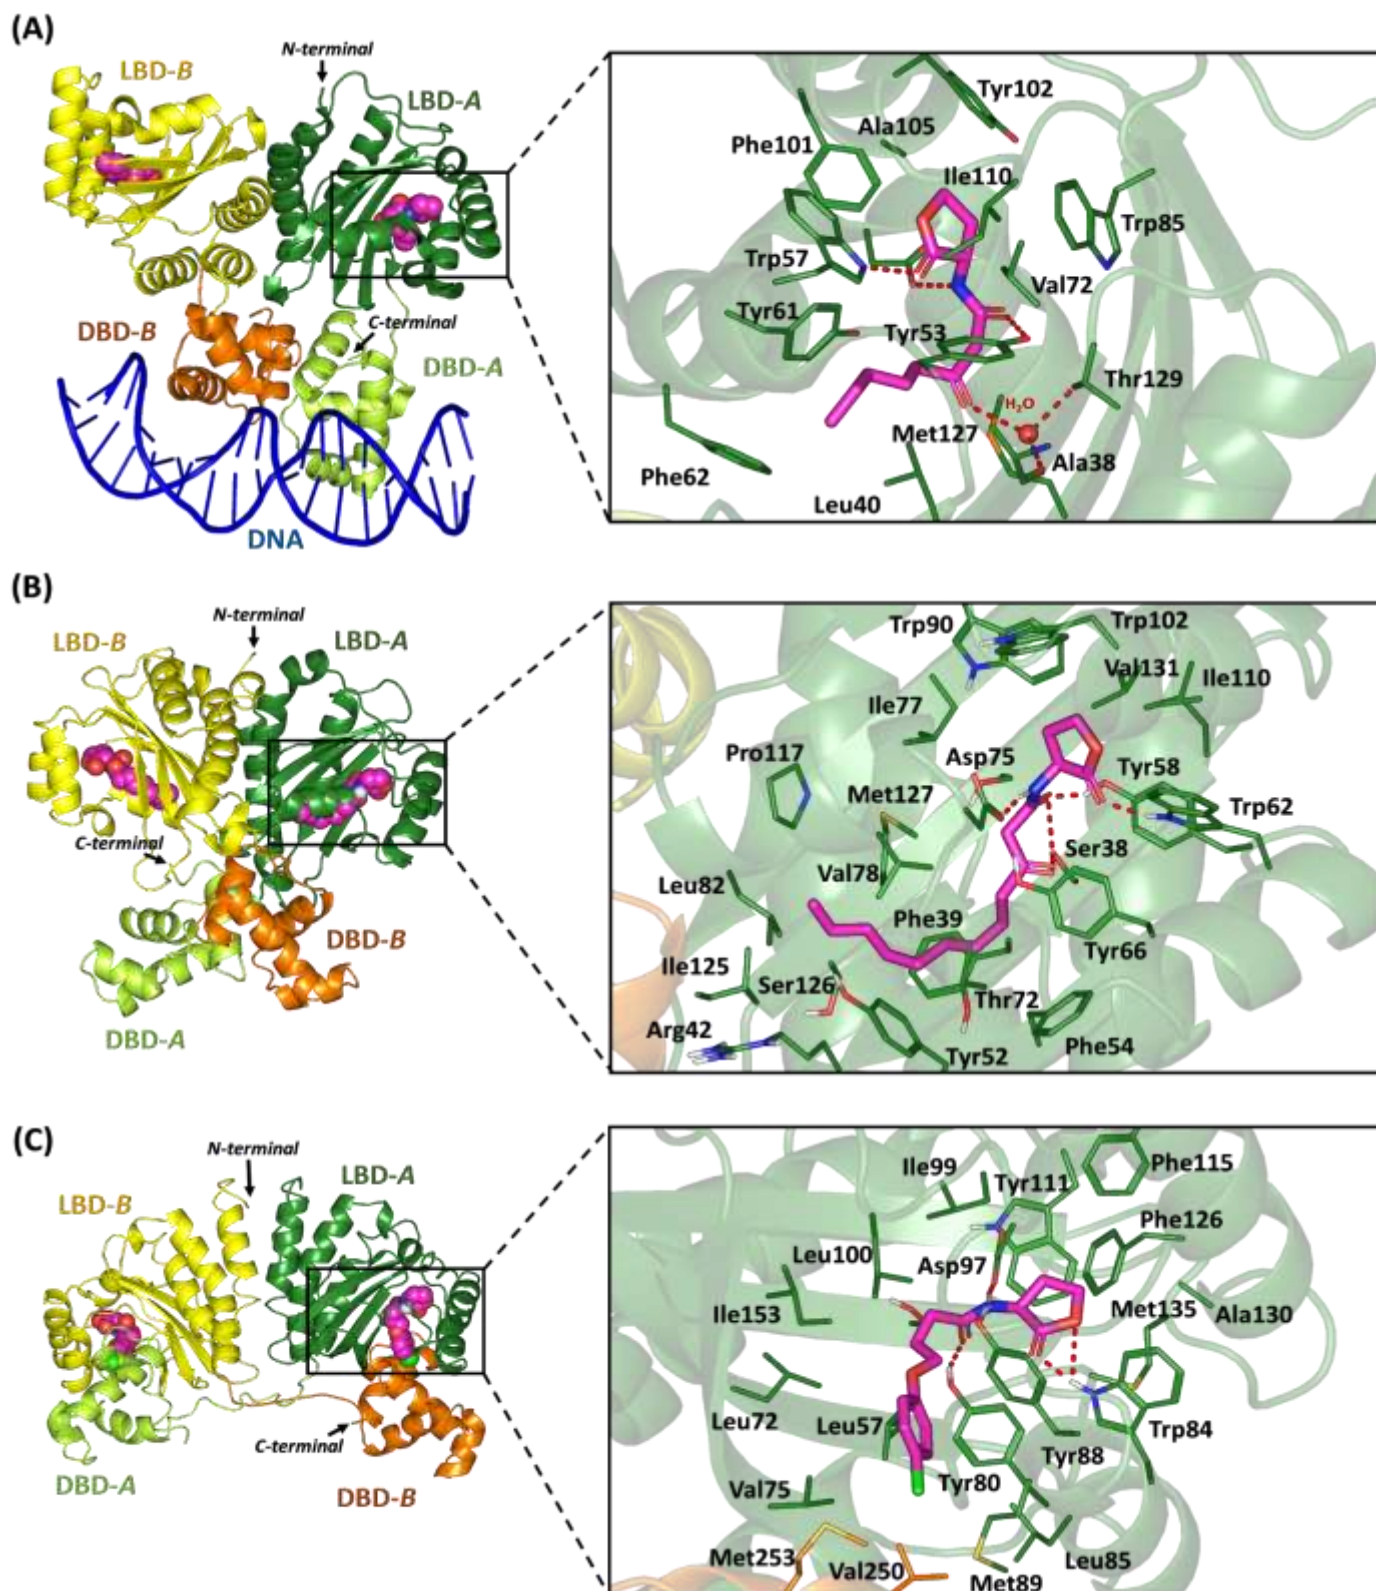

**Figure S5.** The architecture of three bacterial LuxR-type quorum sensing transcription factors. Left panels are overall cartoon representation of the TraR from *A. tumefaciens* PDB entry: 1L3L (A), QscR from *P. aeruginosa* PDB entry: 3SZT (B), and CviR from *C. violaceum* PDB entry: 3QP5 (C), where each protomer is colored differently in regard to its ligand-binding domain (LBD) and DNA-binding domain (DBD) as light/dark green and dark/light orange for protomer-A and -B, respectively. Ligands are represented as magenta spheres, whereas DNA is presented as blue cartoon only at *A. tumefaciens* TraR crystal structure. Right panels are the overlay of each co-crystallized ligand (magenta sticks) at the binding site of its respective bacterial LuxR-type quorum sensing transcription factor; (A) O-C8-HSL, (B) O-C12-HSL, and (C) HLC. Polar interactions, represented as hydrogen bonds, are illustrated as red dashed-lines and only residues (green lines), located within 4 Å radius of bound ligand, are displayed and labeled with sequence number. Crystallized water molecule bridging the ligand/residue interactions is shown as red sphere.

(A)

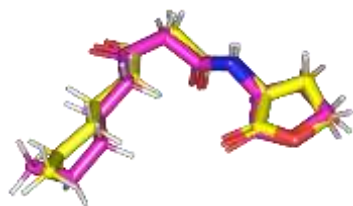

(B)

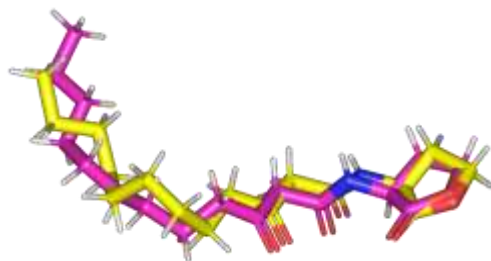

(C)

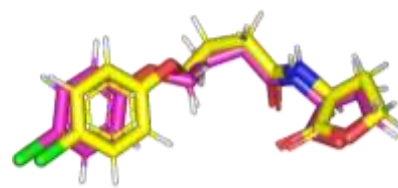

**Figure S6.** Superimposing the co-crystallized (magenta sticks) and redocked (yellow sticks) ligands. (A) TraR *A. tumefaciens*; (B) QscR *P. aeruginosa*; (C) CviR *C. violaceum* for validating the adopted directed docking protocol.
